# Supplementary material
Source: publisher figshare collection journal article supplement (https://gsapubs.figshare.com/ndownloader/files/23319203)
Supplement: Supplementary file 1 [file 23319203]

## Sheet: Table DR1
TABLE DR1. SOIL DESCRIPTIONS AND LABORATORY DATA IN NEWARK VALLEY															TABLE DR1. SOIL DESCRIPTIONS AND LABORATORY DATA IN NEWARK VALLEY
Profile no., elevation, parent materials, lithologies*, GPS location (WGS1984)	Depth (cm)	Horizon†	Moist color	Dry color	Structure	Gravel (visual %)	Gravel (weight %)	Wet con.	Moist con.	Dry con.	Texture	Clay (%)	Silt (%)	Sand (%)	Profile no., elevation, parent materials, lithologies*, GPS location (WGS1984)	Depth (cm)	Horizon†	Clay films	Lower boundary	Efferves-cence	CaCO3 stage§	SiO2 stage#	Gypsum stage**	Cementation	LOI††	Bd (g/cm3)§§	pH	MF††	CaCO3 (%)	HSL No.
North (N) 1	0–9	Av	2.5Y 4.5/4	2.5Y 6.5/3	3mpl	30	11.9548	ssps	vfr	so	SiL	23.6033	60.0763	16.3204	North (N) 1	0–9	Av	nil	aw	EV	none	none	none	none	4.19131	1.541	8.31	0.980375	4.78897	4096
1856 m	9–19	Bwk1	2.5Y 4/4	2.5Y 6/3	2csbk	5	13.7161	sspo	vfr	so	SiL	19.0654	52.4487	28.4859	1856 m	9–19	Bwk1	nil	as	EV	I	none	none	none	3.84952	1.97267	8.53333	0.976572	6.41149	4097
Eolian/beach gravels	19–26	Bwk2	10YR 4/3	10YR 6/3	2msbk	5	15.4671	sopo	vfr	so	SiL	22.9957	59.9815	17.0228	Eolian/beach gravels	19–26	Bwk2	nil	as	EV	I+	none	none	none	3.76902	1.70834	8.57667	0.966739	8.53922	4098
ND	26–43	Bwk3	10YR 4/4	10YR 6/3	1msbk	10	21.4801	sspo	vfr	so	SiL	23.0967	58.7005	18.2028	ND	26–43	Bwk3	nil	as	EV	I+	none	none	none	3.71652	1.6288	8.55667	0.967524	39.4613	4099
39.88464°N, -115.65850°W	43–92	2Bkmq	10YR 7/2	N 10/0	m	35	82.8812	NA	efi	eh	L	19.123	36.6462	44.2309	39.88464°N, -115.65850°W	43–92	2Bkmq	nil	as	EV	IV	I+	none	ci	3.14108	1.91	9.11	0.97809	58.9611	4100
	92–155	2Ckq	10YR 5/4	10YR 7/3	sg	95	87.971	sopo	lo	lo	SL	10.5091	19.0403	70.4506		92–155	2Ckq	nil	as	EV	I+	none	none	none	1.03236	2.32	9.74333	0.992151	43.8977	4101
	155-158	3Bk	10YR 6/6	10YR 6/3	m	0	81.3602	sopo	fi	h	SL	10.5434	10.8916	78.565		155–158	3Bk	nil	as	EV	II+	none	none	cw	0.653988	1.85	9.89	0.994923	61.1181	4102
	158–162	4Ckb	2.5Y 6/3	2.5Y->10YR 7/2	sg	0	8.54701	sopo	lo	lo	SL	14.3254	32.1041	53.5706		158–162	4Ckb	nil	aw	EV	none	none	none	none	1.5614	1.24	9.2	0.979743	51.662	4103
	162–163	5Ckb	10YR 5/4	10YR 7/3	sg	1	19.3182	sopo	lo	lo	SiCL	33.7564	66.2436	0		162–163	5Ckb	nil	aw	EV	none	none	none	none	1.04907	1.24	9.51667	0.983258	46.1607	4104
	163–190+	6Ckqb	10YR 5/4	10YR 7/3	sg	95	ND	sopo	lo	lo	ND	ND	ND	ND		163–190+	6Ckqb	nil	NA	EV	I+	none	none	none	ND	ND	ND	ND	ND
N2	0–8	Av	2.5Y 4/4	2.5Y 6/3	2mpl	15	10.7558	sopo	vfr	so	L	17.3498	44.0636	38.5866	N2	0–8	Av	nil	as	EV	none	none	none	none	2.53057	1.74749	7.9475	0.982084	2.46371	4070
1853 m	8–20	Bwk1	2.5Y 4/4	2.5Y 6/3	1fsbk	10	15.8462	sspo	vfr	so	L	20.9336	49.8641	29.2024	1853 m	8–20	Bwk1	nil	as	EV	I+	none	none	none	3.01196	1.601	8.3475	0.973667	5.05	4071
Eolian/beach gravels	20–28	Bwk2	2.5Y 4/4	2.5Y 6/3	1msbk	25	24.5033	sspo	vfr	so	SiL	19.3819	50.9389	29.6792	Eolian/beach gravels	20–28	Bwk2	nil	as	EV	I+	none	none	none	2.70683	1.74001	8.545	0.971914	10.484	4072
ND	28–39	Bwk3	10YR 5/3	10YR 7/3	1fsbk	20	19.943	sopo	vfr	so	L	21.381	44.266	34.353	ND	28–39	Bwk3	nil	as	EV	I+	none	none	none	3.25091	1.74	8.6225	0.971813	16.1429	4073
39.88058°N, -115.66080°W	39–95	2Bkm	10YR 7/2	N 10/0	m	85	93.2308	NA	fi	h	SL	5.54544	35.9264	58.5281	39.88058°N, -115.66080°W	39–95	2Bkm	nil	aw	EV	III+	none	none	cs/cw	2.52811	1.91	9.04	0.9759	49.5961	4074
	95–207	2Coxkq	10YR 5/3	10YR 7/2	sg	95	79.7957	sopo	lo	lo	SL	10.2415	22.1873	67.5712		95–207	2Coxkq	nil	aw	EV	I	I	none	none	1.02707	1.34	9.705	0.988492	41.461	4075
	207–208	2Ckq	10YR 5/4	10YR 7/2	sg	NR	77.3148	NR	NR	NR	LS	8.64886	12.016	79.3352		207–208	2Ckq	nil	NR	NR	I	I	none	none	1.08524	1.34	10.0525	0.99349	52.0209	4076
	208–230	2Ckq	10YR 5/4	10YR 7/1.5	sg	60	57.0144	sopo	lo	lo	SL	2.44508	29.2628	68.2922		208–230	2Ckq	nil	NA	NR	I+	I+	none	none	0.904485	ND	10.0525	0.993455	49.4468	4077
N3	0–7	Av	10YR 4/3	10YR 6/3	2fpl	10	3.4713	sspo	vfr	so	L	20.4108	44.7811	34.8081	N3	0–7	Av	nil	as	EV	none	none	none	none	3.26568	1.74163	7.805	0.979616	1.44462	4079
1848 m	7–24	Bwk1	10YR 4/4	10YR 6/3	2msbk	10	5.86797	sspo	vfr	so	L	25.3271	43.3202	31.3527	1848 m	7–24	Bwk1	nil	aw	EV	none	none	none	none	2.89258	1.7813	8.2	0.966157	2.55543	4080
Eolian/beach gravels	24–34	Bwk2	10YR 4/4	10YR 6.5/3	2msbk	10	9.01442	sspo	vfr	so	L	25.2075	40.5195	34.273	Eolian/beach gravels	24–34	Bwk2	nil	as	EV	I	none	none	none	2.68133	1.50234	8.405	0.954371	9.53407	4081
vx-mixed	34–73	2Bkmt	10YR 7.5/2	N 10/0	3Cpl/2msbk	10	9.11528	sopo	efi	vh	CL	35.7955	33.6179	30.5866	vx-mixed	34–73	2Bkmt	nil	aw	EV	III	none	none	ci	1.89207	1.64	8.77	0.974558	60.22	4082
	73–118	2Bk	10YR 7/3	10YR 7/2	2msbk/2fpl	20	52	ss	vfr	sh	L	10.5722	39.9877	49.4401		73–118	2Bk	nil	as	EV	I+	none	none	none	2.66098	1.689	9.12	0.974221	47.5331	4083
39.87939°N, -115.66094°W	118–133	3Bkmb	10YR 6/4	10YR 7/3	3Cpl/2msbk	15	21.109	sopo	efi	vh	SL	9.31674	17.6097	73.0736	39.87939°N, -115.66094°W	118–133	3Bkmb	nil	cw	EV	III	none	none	cw	2.23277	1.69	9.115	0.971318	37.9146	4084
	122–195	3Bkb	10YR 5/4	10YR 7/3	1msbk	20	31.9408	ssps	vfr	so	SL	14.2727	18.4692	67.258		122–195	3Bkb	nil	ai	EV	I+	none	none	none	0.93971	1.689	9.72	0.98832	30.0734	4085
	195–250+	4Coxkqb	10YR 5/3.5	10YR 7/3.5	sg	95	79.6029	sopo	lo	lo	SL	9.51027	19.2338	71.2559		195–250+	4Coxkqb	nil	NA	EV	I+	I+	none	none	0.540165	1.34	9.895	0.99481	50.0583	4086
N4	0–11	Av	2.5Y 4/4	2.5Y 6/3	2fpl	10	13.1737	sspo	vfr	so	SiL	19.5786	61.0859	19.3355	N4	0–11	Av	nil	as	EV	none	none	none	none	4.0389	1.61456	8.04	0.980962	2.80556	4060
1845 m	11–29	Bwk	10YR 4/4	2.5Y–>10YR 7/3	2fpl	35	15.7504	ssps	vfr	sh	SiL	18.6237	53.7264	27.6499	1845 m	11–29	Bwk	nil	aw	EV	I+	none	none	none	3.2956	1.93398	8.1175	0.974518	4.86993	4061
Eolian/beach gravels	29–56	2Bk	2.5Y 5/4	2.5Y 6.5/3	sg	75	73.0586	sspo	lo	lo	SL	18.3144	26.5807	55.1049	Eolian/beach gravels	29–56	2Bk	nil	aw	EV	I+	none	none	none	2.90021	1.61	8.385	0.984979	22.1873	4062
ND	56–95	3Ck	10YR 4/4	10YR 7/3	3fpl	0	0.877193	sopo	vfr	sh	SiL	13.7287	56.3147	29.9566	ND	56–95	3Ck	nil	aw	EV	I	none	none	none	2.10781	2.17	8.985	0.980435	j4	4063
39.87722°N, -115.66046°W	95–155	4Ck	10YR 5/4	10YR 6/3	1fpl to 2msbk	0	1.35044	ssps	vfr	sh	SiCL	42.2835	44.0536	13.6629	39.87722°N, -115.66046°W	95–155	4Ck	nil	aw	EV	none	none	none	none	4.23521	1.61456	8.1525	0.94529	4	4064
	155–168	5Ck	10YR 6/4	10YR 7/2.5	2fpl	0	2.6287	sp	vfr	sh	SiC	46.6031	52.0333	1.36358		155–168	5Ck	nil	aw	EV	1+	none	none	none	5.79215	1.61456	8.405	0.924009	48.1809	4065
	168–205	6Ck	10YR 6/4	10YR 7/2	3fpl	5	8.59107	sps	vfr	sh	CL	33.4102	42.758	23.8318		168–205	6Ck	nil	gw	EV	II	none	none	none	5.54647	1.61456	8.275	0.938538	44.6559	4066
	205–235	7Ck	10YR 5/4	10YR 7/3	3mpl	5	3.6129	sopo	fi	vh	SiCL	26.5147	56.2426	17.2427		205–235	7Ck	NR	NA	NR	NR	NR	none	NR	5.16508	1.61456	8.18	0.930808	26.656	4067
N5	0–8	Av	10YR 5/3	10YR 7/2	2fpl	25	16.4286	ssps	vfr	so	SiL	22.4789	52.1322	25.3889	N5	0–8	Av	nil	aw	Ev	none	none	none	none	4.08181	1.9192	8.1	0.983663	5.80216	3990
1846 m	8–25	Bwk1	10YR 4/4	10YR 7/3	2csbk	20	22.3108	sspo	vfr	so	L	17.7257	46.5577	35.7166	1846 m	8–25	Bwk1	nil	aw	EV	I	none	none	none	3.55633	1.6352	8.05	0.969208	12.5772	3991
Eolian/beach gravels	25–33	Bwk2	10YR 4/4	10YR 7/3	sg	50	57.4866	sopo	lo	lo	SL	13.5475	28.4754	57.9771	Eolian/beach gravels	25–33	Bwk2	nil	aw	EV	I+	none	none	none	3.05187	1.51	8.26	0.972096	24.5896	3992
ss, vx-mixed, ls	33–50	2Bk	10YR 5/3	10YR 7/3	sg	65	70.4809	sopo	lo	lo	S	5.5793	7.40291	87.0178	ss, vx-mixed, ls	33–50	2Bk	nil	aw	EV	I–III	none	none	none	2.78129	2.077	8.31	0.990536	51.002	3993
39.87987°N, -115.66587°W	50–150+	2Ckq	10YR 4.5/3	10YR 6/3	sg	95	86.6797	sopo	lo	lo	S	4.09396	7.39211	88.5139	39.87987°N, -115.66587°W	50–150+	2Ckq	nil	NA	EV	I+	I+	none	none	0.975979	1.46	9.04	0.992892	46.1073	3994
TABLE DR1. SOIL DESCRIPTIONS AND LABORATORY DATA IN NEWARK VALLEY															TABLE DR1. SOIL DESCRIPTIONS AND LABORATORY DATA IN NEWARK VALLEY
Profile no., elevation, parent materials, lithologies*, GPS location (WGS1984)	Depth (cm)	Horizon†	Moist color	Dry color	Structure	Gravel (visual %)	Gravel (weight %)	Wet con.	Moist con.	Dry con.	Texture	Clay (%)	Silt (%)	Sand (%)	Profile no., elevation, parent materials, lithologies*, GPS location (WGS1984)	Depth (cm)	Horizon†	Clay films	Lower boundary	Efferves-cence	CaCO3 stage§	SiO2 stage#	Gypsum stage††	Cementation	LOI††	Bd (g/cm3)§§	pH	MF††	CaCO3 (%)	HSL No.
N6	0–7	Av	2.5Y 4/4	2.5Y 6/3	2fpl	15	14.8771	sspo	vfr	so	SiL	26.3257	56.4061	17.2682	N6	0–7	Av	nil	as	ES	none	none	none	none	5.99781	1.86	7.75667	0.974448	1.95343	3971
1856 m	7–15	Bwk1	2.5Y 5/4	2.5Y 6/3	1msbk	35	18.9655	sspo	vfr	so	SiL	22.6369	60.7529	16.6101	1856 m	7–15	Bwk1	nil	as	EV	I	none	none	none	4.5604	1.87	8.11	0.968784	7.34331	3972
Eolian/beach gravels	15–30	Bkt	2.5Y 5/4	2.5Y 6/3	2fsbk(75%) 2csbk(25%)	20	14.5907	sspo	vfr	so	SiCL	32.7142	50.1544	17.1314	Eolian/beach gravels	15–30	Bkt	nil	aw	EV	I	none	none	none	3.86466	1.67	7.995	0.969086	11.5162	3973
vx-mixed	30–44	Bwk2	10YR 5/4	2.5Y–>10 YR 6/3	2m–csbk	30	23.5974	sspo	vfr	so	SiL	23.0443	58.2152	18.7405	vx-mixed	30–44	Bwk2	nil	aw	EV	I+	none	none	none	3.82738	1.74	7.845	0.969166	15.7123	3974
39.88717°N, -115.66525°W	44–99	2Bkm	10YR 7/3	N 10/0	m	75	53.6634	sspo	fi	h	SiL	15.5965	53.3027	31.1007	39.88717°N, -115.66525°W	44–99	2Bkm	nil	aw	EV	III+	none	none	cs/cw	2.32607	1.91	8.955	0.968105	54.1255	3975
	99–165	2Ck	2.5Y 6/3	10YR 7/2	sg	85	84.6966	sopo	lo	lo	LS	4.5306	15.6807	79.7887		99–165	2Ck	nil	as	EV	I	none	none	none	1.40826	1.34	9.325	0.969643	33.97	3976
	165–195+	3C	2.5Y 5/3	2.5Y 6/2	sg	1	2.94118	sspo	lo	lo	SL	16.5175	12.5587	70.9238		165–195+	3C	nil	NA	EV	none	none	none	none	1.1031	1.86	9.29667	0.983018	48	3977
	gravels within 3C	NA	10YR 5/4	10YR 7/2	NR	NR	45.6942	NR	NR	NR	SL	11.8374	22.5426	65.62		gravels within 3C	NA	NR	NA	NA	NA	NA	NA	NA	1.38368	NA	8.695	0.98145	32.4878	3978
N7	0–10	Av	2.5Y 4/3	2.5Y 7/3	2fpl	5	10.9043	sspo	vfr	sh	SiL	21.188	61.9085	16.9035	N7	0–10	Av	nil	as	ES	none	none	none	none	3.44454	1.63	7.5	0.982175	1.29	3983
1866 m	10–26	Bwk	10YR 5/4	10YR 7/3	2msbk	25	16.8595	sspo	vfr	sh	SiL	26.3226	54.5503	19.1271	1866 m	10–26	Bwk	nil	aw	EV	I	none	none	none	3.43568	2	7.86333	0.964173	2.76598	3984
Eolian/beach gravels	26–76	2Bkmt	10YR 7/3	N 10/0	2csbk	50	44.3723	sspo	vfr	vh	L	14.8876	36.834	48.2784	Eolian/beach gravels	26–76	2Bkmt	nil	aw	EV	III+	none	cw	none	2.51359	1.79	8.14	0.966001	28.875	3985
vx-mixed	76–130	2Ck	10YR 5/4	10YR 7/3	sg	50	65.7708	sopo	lo	lo	SL	8.17328	21.8463	69.9804	vx-mixed	76–130	2Ck	nil	aw	EV	I+	I+	none	none	2.48892	1.34	9.12	0.969773	34.8805	3986
39.88762°N, -115.66591°W	131–240+	3Ckq	10YR 5/3	10YR 7/5	NR	>95	63.8502	sopo	lo	lo	S	1.46472	11.9977	86.5376	39.88762°N, -115.66591°W	131–240+	3Ckq	nil	NA	EV	I	I	none	none	0.749963	1.34	9.17	0.991021	40.0659	3987
Warm Springs Gravel Pit	0–7	Av	10YR 5/3	10YR 7/2	1f–>msbk	<10	32.0532	sp	vfr	sh	SiL	6.70364	73.8619	19.4345	Warm Springs Gravel Pit	0–7	Av	nil	as	EV	none	none	none	none	3.64874	1.46117	8.015	0.987881	20.7635	4241
~1846 m	7–22	Bwk1	10YR 5/3	10YR 7/2	2f–>msbk	25–50	40.1389	sp	vfr	so	SiL	17.181	58.8749	23.944	~1846 m	7–22	Bwk1	nil	cs	EV	I	none	none	none	2.08101	1.40796	7.995	0.975479	22.6936	4242
Eolian/beach gravels	22–32	Bwk2	10YR 5/4	10YR 7/3	2f–>msbk	25–50	43.9206	sps	vfr	so	SiL	17.6274	57.5235	24.8491	Eolian/beach gravels	22–32	Bwk2	nil	cw	EV	I	none	none	none	2.08753	1.83393	8.39	0.976691	31.2526	4243
ND	32–43	Bwk3	10YR 6/4	10YR 7/3	v1vfsbk	50–75	70.6494	ssps	vfr	so	L	12.8439	43.8504	43.3057	ND	32–43	Bwk3	nil	cw	EV	I	none	none	none	2.19294	ND	8.84	0.976673	37.9661	4244
39.794.80N, -115.61394°W	43–54	Bwk4	10YR 6/4	10YR 7/3	v1vfsbk	50–75	56.7322	sopo	vfr	so	L	11.6241	45.1602	43.2157	39.794.80N, -115.61394°W	43–54	Bwk4	nil	cs	EV	I	none	none	none	1.78445	ND	8.32	0.976065	31.8658	4245
	54–90+	2Ck	10YR 6/3	10YR 7/3	sg	>75	81.0692	sopo	lo	lo	SL	9.80078	11.785	78.4142		54–90+	2Ck	nil	NA	EV	I	none	none	none	1.47772	ND	ND	0.986596	65.023	4246
Becks Pass (BP) 1	0–11	Av	10YR5/3	10YR7/2	3fpl –>1fsbk	10	ND	sopo	vfr	so	SL	ND	ND	ND	Becks Pass (BP) 1	0–11	Av	nil	as	EV	none	none	none	none	ND	ND	ND	1.57746	ND	4247
1853 m	11–19	Bwk1	10YR5/3	10YR7/2	1msbk	20	ND	ssps	vfr	sh	SL	ND	ND	ND	1853 m	11–19	Bwk1	nil	as	EV	I	none	none	none	ND	ND	ND	1.36431	ND	4248
Eolian/beach gravels	19–31	Bwk2	10YR5/3	10YR6/3	1fsbk	15	ND	sopo	vfr	so	SL	ND	ND	ND	Eolian/beach gravels	19–31	Bwk2	nil	as	EV	I	none	none	none	ND	ND	ND	1.45349	ND	4249
ss, ls	31–56	2Bkm	10YR7/3	N 10/0	m	>75	ND	sopo	efi	eh	SL	ND	ND	ND	ss, ls	31–56	2Bkm	1f–>d clast	aw	EV	III+	none	none	ci	ND	ND	ND	1.75	52.9	4250
39.58901°N, -115.57920°W	56–116+	2Coxk	10YR6/6	10YR7/4	sg	>75	ND	sopo	lo	lo	SL	ND	ND	ND	39.58901°N, -115.57920°W	56–116+	2Coxk	1d clast sg	NA	EV	1+	none	none	none	ND	ND	ND	ND	ND	4251
BP2	0–9	Av	10YR5/3	10YR6/3	v1msbk	5	ND	sopo	vfr	sh	SL	ND	ND	ND	BP2	0–9	Av	nil	as	EV	none	none	none	none	ND	1.36562	ND	ND	ND	NA
~1850 m	9–20	Bwk1	2.5Y5/4	10YR7/2	1fsbk	5	ND	sopo	vfr	so	SL	ND	ND	ND	~1850 m	9–20	Bwk1	nil	as	EV	I	none	none	none	ND	1.41516	ND	ND	ND	NA
Eolian/beach gravels	20–40	Bwk2	10YR5/3	10YR7/3	1msbk	30	ND	sopo	vfr	sh	SL	ND	ND	ND	Eolian/beach gravels	20–40	Bwk2	nil	aw	EV	I	none	none	none	ND	1.58304	ND	ND	ND	NA
ss, ls	40–67	2Bkm	10YR7/2	N 10/0	m	90	ND	sopo	vfi	vh	SL	ND	ND	ND	ss, ls	40–67	2Bkm	nil	cw	EV	III+	none	none	ci/cw	ND	ND	ND	ND	ND	NA
39.58697°N, -115.58098°W	67–119+	2Coxk	10YR5/4	10YR6/3.5	sg	95	ND	sopo	lo	lo	SL	ND	ND	ND	39.58697°N, -115.58098°W	67–119+	2Coxk	2d clast sg	NA	EV	I+	none	none	cw	ND	ND	ND	ND	ND	NA
BP3	0–7	Av	10YR5/3	10YR6/3	1fsbk	5	ND	sopo	vfr	so	SL	ND	ND	ND	BP3	0–7	Av	nil	as	EV	none	none	none	none	ND	1.57772	ND	ND	ND	NA
~1849 m	7–14	Bwk1	10YR5/3	10YR6/3	1fsbk	5	ND	sopo	vfr	so	SL	ND	ND	ND	~1849 m	7–14	Bwk1	nil	as	EV	I	none	none	none	ND	1.46	ND	ND	ND	NA
Eolian/beach gravels	14–40	Bwk2	10YR5/3	10YR7/3	1msbk	8	ND	sopo	vfr	so	SL	ND	ND	ND	Eolian/beach gravels	14–40	Bwk2	nil	aw	EV	I	none	none	none	ND	1.47	ND	ND	ND	NA
ss, ls	40–65	2Bkm	10YR7/3	N 10/0	m	35	ND	sopo	vfi	eh	SL	ND	ND	ND	ss, ls	40–65	2Bkm	nil	cw	EV	III+	none	none	ci/cw	ND	1.635	ND	ND	ND	NA
39.58536°N, -115.58272°W	65–117+	2Coxk	10YR6/4	10YR7/4	sg	>90	ND	sopo	lo	lo	S	ND	ND	ND	39.58536°N, -115.58272°W	65–117+	2Coxk	2d clast	NA	EV	I+	none	none	none	ND	ND	ND	ND	ND	NA
TABLE DR1. SOIL DESCRIPTIONS AND LABORATORY DATA IN NEWARK VALLEY															TABLE DR1. SOIL DESCRIPTIONS AND LABORATORY DATA IN NEWARK VALLEY
Profile no., elevation, parent materials, lithologies*, GPS location (WGS1984)	Depth (cm)	Horizon†	Moist color	Dry color	Structure	Gravel (visual %)	Gravel (weight %)	Wet con.	Moist con.	Dry con.	Texture	Clay (%)	Silt (%)	Sand (%)	Profile no., elevation, parent materials, lithologies*, GPS location (WGS1984)	Depth (cm)	Horizon†	Clay films	Lower boundary	Efferves–cence	CaCO3 stage§	SiO2 stage#	Gypsum stage††	Cementation	LOI††	Bd (g/cm3)§§	pH	MF††	CaCO3 (%)	HSL No.
BP4	0–10	Av	10YR5/3	10YR7/2	1f–>msbk–75% 1mpl–25%	<10	ND	ssp	vfr	sh	SiCL	ND	ND	ND	BP4	0–10	Av	nil	as	EV	none	none	none	none	ND	ND	ND	ND	ND	NA
~1846 m	10–32	2Bwk	10YR5/3.5	10YR6/3	sg	85	ND	sopo	lo	lo	S	ND	ND	ND	~1846 m	10–32	2Bwk	nil	cs	EV	I+	none	none	none	ND	ND	ND	ND	ND	NA
Eolian/beach gravels	32–72+	2Coxk	10YR5/5	10YR6/3	sg	90	ND	sopo	lo	lo	S	ND	ND	ND	Eolian/beach gravels	32–72+	2Coxk	nil	NA	EV	I+	none	none	none	ND	ND	ND	ND	ND	NA
ss, ls															ss, ls
39.58485°N, -115.58396°W															39.58485°N, -115.58396°W
BP5	0–9	Av	10YR4/2	10YR7/2.5	1fsbk	5	ND	sopo	vfr	so	SiL	ND	ND	ND	BP5	0–9	Av	nil	as	EV	I	none	none	none	ND	ND	ND	ND	ND	NA
~1845 m	9–15	Bwk1	10YR5/3	10YR7/3	1fsbk	10	ND	sopo	vfr	so	SiL	ND	ND	ND	~1845 m	9–15	Bwk1	nil	as	EV	I	none	none	none	ND	ND	ND	ND	ND	NA
Eolian/beach gravels	15–24	Bwk2	10YR5/3	10YR7/3	1msbk	10	ND	sopo	vfr	so	SL	ND	ND	ND	Eolian/beach gravels	15–24	Bwk2	nil	as	EV	I	none	none	none	ND	ND	ND	ND	ND	NA
ss, ls	24–37	Bwk3	10YR5/3	10YR6.5/3	1msbk	25	ND	sopo	vfr	so	SL	ND	ND	ND	ss, ls	24–37	Bwk3	nil	as	EV	I	none	none	none	ND	ND	ND	ND	ND	NA
39.58445°N, -115.58443°W	37–63	2Bwk	10YR5/3.5	10YR7/3	sg	50	ND	sopo	lo	lo	SL	ND	ND	ND	39.58445°N, -115.58443°W	37–63	2Bwk	nil	as	EV	I	none	none	none	ND	ND	ND	ND	ND	NA
	63–109+	2Coxk	10YR5/5	10YR7/3	sg	75	ND	sopo	lo	lo	S	ND	ND	ND		63–109+	2Coxk	nil	NA	EV	I+	none	none	none	ND	ND	ND	ND	ND	NA
Pancake (P1)	0–15	Av	10YR4/4	10YR6/3	3fpl	10	4.81928	ssps	vfr	so	SL	12.1004	16.3911	71.5085	Pancake (P1)	0–15	Av	nil	cw	EV	none	none	none	none	2.37883	1.54	8.05	0.977414	2.59966	4159
1849 m	15–48	Btk	10YR4.5/4	10YR5/4	1f–>msbk	65	13.8996	ssps	vfr	so	SCL	20.5347	12.3192	67.1461	1849 m	15–48	Btk	nil	ci	EV	I	none	none	none	2.53176	1.41586	8	0.966007	1.41182	4160
Eolian/beach gravels	48–94	2Bkm (K)	10YR7/3	N 10/0	m	65	86.3324	sopo	fi	h	SL	11.3899	16.4006	72.2095	Eolian/beach gravels	48–94	2Bkm (K)	nil	gw	EV	III+	none	none	ci	2.03582	1.91389	8.31	0.9663	48.35	4161
ss, rhy, b, cgl-si, ch, ls	94–117	2Btk	10YR6/6	10YR6/4	sg	90	78.3478	sp	lo	lo	L	24.6423	29.0327	46.325	ss, rhy, b, cgl-si, ch, ls	94–117	2Btk	2dcl	gi	EV	I+to II	none	none	none	1.4719	1.86	9.33	0.954414	26.6737	4162
39.46117°N, -115.68549°W	117–230+	2Ck	10YR5/6	10YR6/6	sg	95	92.517	ssps	lo	lo	SL	17.6047	19.2485	63.1467	39.46117°N, -115.68549°W	117–230+	2Ck	2dcl	NA	EV	I+	none	none	none	1.97925	1.86	9.12	0.975298	11.6267	4163
P2	0–12	Av	10YR5/3	10YR7/3	3fpl, 1msbk	10	16.7241	ssps	fr	sh	SL	13.6736	31.4067	54.9196	P2	0–12	Av	nil	cs	EV	I	none	none	none	2.09448	1.4911	7.86	0.98413	14.751	4164
1853 m	12–29	Bwk1	10YR5/4	10YR7/3	2f–>msbk	8	17.5439	ssps	vfr	so	SL	17.6522	27.1668	55.181	1853 m	12–29	Bwk1	nil	gw	EV	I	none	none	none	2.14524	1.54767	7.9	0.96968	18.5242	4165
Eolian/beach gravels	29–59	Bwk2	10YR5/4	10YR7/3	v1sbk	10	20.7161	sopo	lo	lo	SL	10.8676	16.7974	72.335	Eolian/beach gravels	29–59	Bwk2	nil	cw	EV	I	none	none	none	1.58557	1.70654	7.95	0.966181	24.8875	4166
ss, cgl-si, rhy, qtz-sis	59–88	2Bkm	10YR7/3	N 10/0	m	75	46.932	sopo	fr	h	S	7.09903	6.34251	86.5585	ss, cgl-si, rhy, qtz-sis	59–88	2Bkm	nil	as	EV	III	none	none	cw	1.315	1.85497	9.7	0.987315	43.61	4167
39.45571°N, -115.67521°W	88–192	2Coxk	10YR5/6	10YR7/4	sg	75		sopo	lo	lo					39.45571°N, -115.67521°W	88–192	2Coxk	nil	gw	EV	I+	none	none	none	See Below					NA
	100–125						75.3994				S	7.46027	2.20008	90.3396		100–125									0.728484	1.51	9.65	0.988738	25.2261	4168
	125–192						32.5301				S	6	2	93		125–192									0.466937	1.45	9.69	0.99236	20.2984	4169
	192–238	3Ck	10YR7/4	10YR7/3	m, 2m–>csbk	10	12.3967	ssp	vfr	sh	CL	29.0062	28.9194	42.0744		192–238	3Ck	nil	gi	EV	I+	none	none	none	1.37351	1.36565	8.38	0.938661	40	4170
	238–263+	4Ck(b?)	10YR6/4	10YR7/2	m	90	78.2222	sopo	lo	lo	SL	9.5507	18.2341	72.2152		238–263+	4Ck(b?)	nil	NA	EV	I+	none	none	none	1.24094	1.45	8.86	0.971119	23.5502	4171
P3	0–13	Av	10YR5/3	10YR7/3	3fpl	<5	34.3158	sp	vfr	sh	L	13.9256	48.7136	37.3608	P3	0–13	Av	nil	aw	EV	none	none	none	none	1.88801	1.43804	8.04	0.977808	13.9212	4172
~1862 m	13–30	Bwk1	10YR5/4	10YR7/4	v1 sbk	<10	25.1825	ssps	lo	lo	L	17.4668	40.6454	41.8878	~1862 m	13–30	Bwk1	nil	cw	EV	I+	none	none	none	2.38199	1.33783	8.4	0.962041	18.7749	4173
Eolian/beach gravels	30–51	Bwk2	10YR6/4	10YR7/4	2msbk	15	34.2857	ssps	fr	sh	L	14.5081	43.634	41.8579	Eolian/beach gravels	30–51	Bwk2	nil	ci	EV	I+	none	none	none	2.36696	1.47703	9.23	0.937588	26.9573	4174
ch, cgl-si, ss, rhy, ls	51–67	2Bkmt	10YR7/3	N 10/0	m	50	63.4573	ssps	fr	h	CL,L	26.9963	32.484	40.5196	ch, cgl-si, ss, rhy, ls	51–67	2Bkmt	nil	gi	EV	III+	none	none	cw	2.55706	1.77394	8.23	0.909748	38.7238	4175
39.45230°N, -115.66722°W	67–95	2Bky	10YR5/6	10YR6/6	sg	60	69.835	sopo	lo	lo	SL	15.0118	11.1948	73.7934	39.45230°N, -115.66722°W	67–95	2Bky	nil	gi	EV	I	none	II+	none	1.26427	1.51	8.38	0.954328	30.4181	4176
	95–156	2Cky	10YR5/6	10YR6/6	sg	80	76.851	sopo	lo	lo	SL	13.7474	17.8123	68.4403		95–156	2Cky	nil	cw	EV	I+	none	II	none	1.86292	1.45	8.19	0.961994	30.652	4177
	100–120															100–120										1.71
	156–185	2Ck	10YR5/6	10YR6/4	sg	35	2.24458	sopo	lo	lo	SL	12.5314	14.7603	72.7083		156–185	2Ck	nil	gw	EV	I	none	none	none	1.40887	1.46	9.37	0.966909	17.9155	4178
	171–182															171–182										1.24
	185–230+	2Ck	10YR5/6	10YR6/4	sg	<10	20.9398	sopo	lo	lo	SL,LS	11.5053	7.56627	80.9284		185–230+	2Ck	nil	NA	EV	none	none	none	none	1.39926	1.46003	9.34	0.971642	28.406	4179
TABLE DR1. SOIL DESCRIPTIONS AND LABORATORY DATA IN NEWARK VALLEY															TABLE DR1. SOIL DESCRIPTIONS AND LABORATORY DATA IN NEWARK VALLEY
Profile no., elevation, parent materials, lithologies*, GPS location (WGS1984)	Depth (cm)	Horizon†	Moist color	Dry color	Structure	Gravel (visual %)	Gravel (weight %)	Wet con.	Moist con.	Dry con.	Texture	Clay (%)	Silt (%)	Sand (%)	Profile no., elevation, parent materials, lithologies*, GPS location (WGS1984)	Depth (cm)	Horizon†	Clay films	Lower boundary	Efferves-cence	CaCO3 stage§	SiO2 stage#	Gypsum stage††	Cementation	LOI††	Bd (g/cm3)§§	pH	MF††	CaCO3 (%)	HSL No.
P4	0–16	Av	2.5Y5/4	2.5Y7/3	3fpl	<10	26.9316	sp	vfr	so	L	24.8388	43.7368	31.4244	P4	0–16	Av	nil	cw	EV	none	none	none	none	2.96792	1.65293	8.3	0.981258	19.1105	4180
1880 m	16–32	Bwk	10YR5/4	10YR6/3	2f–>msbk	10	23.445	ssps	vfr	so	CL,L	27.3409	40.0884	32.5707	1880 m	16–32	Bwk	nil	gi	EV	I	none	none	none	3.15521	1.35759	8.11	0.978311	18.1663	4181
Eolian/beach gravels/ lake clays	32–65	2Bkm	10YR7/4	N 10/0	m	10	33.3801	ssps	fr	h	L	23.0469	38.1779	38.7753	Eolian/beach gravels/ lake clays	32–65	2Bkm	nil	gi	EV	III+	none	none	cw	3.10082	1.63083	8.28	0.980684	25.6234	4182
cgl-si, ch, few ls	65–100	2Btjk	2.5Y5/4	2.5Y4/4	sg	85	69.6466	sps	lo	lo	CL	30.4879	26.4793	43.0328	cgl-si, ch, few ls	65–100	2Btjk	2fco	ci	EV	I	none	none	none	2.9675		8.6	0.983257	24.0024	4183
39.44593°N, -115.66615°W	65–85														39.44593°N, -115.66615°W	65–85										1.75627
	85–100															85–100										1.73
	100–114	3Byk	2.5Y5/4	2.5Y7/4	1fgr	50	71.4286	sp	vfr	so	CL	33	24	43		100–114	3Byk	1dbrco	cw	EV	I	none	II	none	2.79736	1.6	8.32	0.958456	16.6576	4184
	114–125	3Gykb	10YR5/3	10YR6/3	2f–>msbk	15	9.34183	vsp	vfr	sh	SiL	9.55168	55.1961	35.2523		114–125	3Gykb	v1fpf	cw	EV	I	none	III	none	4.28096	1.46804	8.09	0.917079	6.81457	4185
	125–189+	4Cgkb	2.5Y5/3	2.5Y6/3	m	one clast	0	vsvp	vfi	vh	SiCL	34	65	1		125–189+	4Cgkb	nil	dNA	EV	I	none	I	none	2.81899	2.21658	8.84	0.962812	9.09848	4186
P5	0–14	Av	10YR5/3	10YR7/2	2fpl	10	ND	sspo	vfr	so	SL	ND	ND	ND	P5	0–14	Av	nil	cw	EV	I	none	none	none	ND	1.48245	ND	ND	ND	NA
~1850 m	14–32	Bwk1	10YR5/3	10YR7/2	2msbk	10	ND	sspo	vfr	so	SL	ND	ND	ND	~1850 m	14–32	Bwk1	nil	gw	EV	I	none	none	none	ND	1.47775	ND	ND	ND	NA
Eolian/beach gravels	32–56	Bwk2	10YR5/3	10YR7/3	1fsbk	10	ND	sopo	vfr	so	LS	ND	ND	ND	Eolian/beach gravels	32–56	Bwk2	nil	ci	EV	I	none	none	none	ND	1.61806	ND	ND	ND	NA
ch, cgl-si, b, ls	56–93	2Bkm	10YR7/2	N 10/0	m	60	ND	sops	fr	vh	LS	ND	ND	ND	ch, cgl-si, b, ls	56–93	2Bkm	nil	gi	EV	III+	none	none	cs	ND	1.63125	ND	ND	ND	NA
39.46186°N, -115.68749°W	93–134	2Cyk	10YR5/4	10YR7/3	sg	75	ND	sopo	lo	lo	S	ND	ND	ND	39.46186°N, -115.68749°W	93–134	2Cyk	nil	cw	EV	I	none	II	none	ND	ND	ND	ND	ND	NA
	134–150	3Gkb?	10YR7/3	10YR8/2	3vfpr	<5	ND	sopo	fi	h	S	ND	ND	ND		134–150	3Gkb?	nil	cw	EV	none	none	III	none	ND	1.6699	ND	ND	ND	NA
	150–220+	3Bwyk(t?)b?	10YR6/4	10YR7/3	2fpl	20	ND	sp	fr	so	SCL	ND	ND	ND		150–220+	3Bwyk(t?)b?	nil	–	EV	I	none	II	none	ND	1.67548	ND	ND	ND	NA
P6	0–22	Av	10YR5/3	10YR7/2	3fpl	<10	ND	sp	vfr	so	SL	ND	ND	ND	P6	0–22	Av	nil	cw	EV	none	none	none	none	ND	1.83681	ND	ND	ND	NA
~ 1859 m	22–40	Bwk	10YR5/4	10YR6/3	2msbk	10	ND	sspo	vfr	so	SiL	ND	ND	ND	~ 1859 m	22–40	Bwk	nil	gi	EV	I	none	none	none	ND	2.01738	ND	ND	ND	NA
Eolian/beach gravels	40–89	2Bkm	10YR6/3	N 10/0	m	90	ND	sopo	fi	vh	S	ND	ND	ND	Eolian/beach gravels	40–89	2Bkm	nil	cw	EV	III+	none	none	ci-continuous	ND	1.8715	ND	ND	ND	NA
cgl-si, ch, ss, rhy, very few ls	89–95	3Ck	10YR6/4	10YR7/2	m	0	ND	sopo	fi	vh	SL	ND	ND	ND	cgl-si, ch, ss, rhy, very few ls	89–95	3Ck	nil	as	EV	I+	none	none	none	ND	1.85592	ND	ND	ND	NA
	95–113	4Ck	10YR5/4	10YR6/3	sg	60	ND	sopo	lo	lo	S	ND	ND	ND		95–113	4Ck	nil	cs	EV	I	none	none	cs-discontinuous	ND	ND	ND	ND	ND	NA
39.45272°N, -115.67269°W	113–146	5Bkb	10YR5/3	10YR7/3	2msbk	<10	ND	sspo	fr	sh	SiL	ND	ND	ND	39.45272°N, -115.67269°W	113–146	5Bkb	nil	gw	EV	II	none	none	none	ND	2.03153	ND	ND	ND	NA
	146–183+	6Bkb	10YR6/4	10YR7/2	sg	85	ND	sopo	lo	lo	SL	ND	ND	ND		146–183+	6Bkb	nil	NA	EV	II	none	none	none	ND	ND	ND	ND	ND	NA
P7	0–8	Av	10YR 4/3	10YR 7/3	3vfpl	<10	ND	sp	fi	sh	CL	ND	ND	ND	P7	0–8	Av	nil	cs	EV	none	none	none	none	ND	ND	ND	ND	ND	NA
~1838 m	8–80+	2Ckqy	10YR	10YR	sg	95	ND	sopo	lo	lo	S	ND	ND	ND	~1838 m	8–80+	2Ckqy	nil	NA	EV	I+	none	I	none	ND	ND	ND	ND	ND	NA
Eolian/beach gravels															Eolian/beach gravels
ND															ND
39.46273°N, -115.68067°W															39.46273°N, -115.68067°W
P8	0–2	Av1	2.5Y 5/3	2.5Y 6/3	1vfpl–> 2fsbk	<10	ND	ND	ND	ND	ND	ND	ND	ND	P8	0–2	Av1	ND	ND	ND	ND	ND	ND	ND	ND	ND	ND	ND	ND	NA
~ 1846 m	2–9	Av2	2.5Y 5/4	2.5Y 7/3	2mpl–> 2msbk	10	ND	sh	vfr	sopo	SL –> L	ND	ND	ND	~ 1846 m	2–9	Av2	nil	cs	EV	none	none	none	none	ND	ND	ND	ND	ND	NA
Eolian/beach gravels	9–24	Bwk1	2.5Y 5/4	2.5Y 7/3	2msbk	20	ND	sh	vfr	sspo	SL	ND	ND	ND	Eolian/beach gravels	9–24	Bwk1	nil	cw	EV	none	none	none	none	ND	ND	ND	ND	ND	NA
ND	24–37	Bwk2	2.5Y 5/3	2.5Y 7/3	1fsbk	20	ND	sh	fr	sopo	SL	ND	ND	ND	ND	24–37	Bwk2	nil	cw	EV	I–	none	none	none	ND	ND	ND	ND	ND	NA
39.45958°N, -115.67346°W	37–54	Bwk3	2.5Y 5/3	2.5Y 7/3	2msbk	25		sh	vfr	sopo	SL	ND	ND	ND	39.45958°N, -115.67346°W	37–54	Bwk3	nil	cw	EV	I–	none	none	none						NA
	54–84	2Cky	2.5Y 5/4	2.5Y 7/4	sg	40	ND	lo	lo	sopo	SL	ND	ND	ND		54–84	2Cky	nil	cs	EV	I–	none	NR	none	ND	ND	ND	ND	ND	NA
	84–110+	2Ckqy	2.5Y 5/3.5	2.5Y 7/3.5	sg	50	ND	lo	lo	sopo	S	ND	ND	ND		84–110+	2Ckqy	nil	NA	EV	I	none	NR	none	ND	ND	ND	ND	ND	NA
TABLE DR1. SOIL DESCRIPTIONS AND LABORATORY DATA IN NEWARK VALLEY															TABLE DR1. SOIL DESCRIPTIONS AND LABORATORY DATA IN NEWARK VALLEY
Profile no., elevation, parent materials, lithologies*, GPS location (WGS1984)	Depth (cm)	Horizon†	Moist color	Dry color	Structure	Gravel (visual %)	Gravel (weight %)	Wet con.	Moist con.	Dry con.	Texture	Clay (%)	Silt (%)	Sand (%)	Profile no., elevation, parent materials, lithologies*, GPS location (WGS1984)	Depth (cm)	Horizon†	Clay films	Lower boundary	Efferves-cence	CaCO3 stage§	SiO2 stage#	Gypsum stage††	Cementation	LOI††	Bd (g/cm3)§§	pH	MF††	CaCO3 (%)	HSL No.
Lone Mountain (LMt.) 1	0–5	Ap	10YR 4/2	10YR 5/3	NA	NA	10.0917	NA	NA	NA	SL	11.0586	19.6372	69.3042	Lone Mountain (LMt.) 1	0–5	Ap	nil	as	none	none	none	none	none	3.85746	ND	8.06	0.980099	3.7815	4114
1846 m	5–10	Bwk1	2.5Y 5/3	2.5Y 6/3	1f–>msbk	10	12.5316	sopo	vfr	so	L	19.0582	30.799	50.1428	1846 m	5–10	Bwk1	nil	as	EV	I	none	none	none	3.61729	1.91342	8.06333	0.982306	5.86427	4115
Eolian/beach gravels	10–22	Bwk2	10YR 5/3	2.5Y 6/3	1f–>msbk	15	12.263	sssp	vfr	so	L	22.1598	36.9556	40.8846	Eolian/beach gravels	10–22	Bwk2	nil	as	EV	I+	none	none	none	3.46126	2.16903	8.13333	0.969258	8.26117	4116
ss, ls, dol	22–38	Bwk3	10YR 5/4	10YR 7/3	1msbk 60%, 1mgr 40%	25	27.8261	sspo	vfr	so	L	19.4663	29.9092	50.6245	ss, ls, dol	22–38	Bwk3	nil	aw	EV	I	none	none	none	3.84573	1.90438	7.98667	0.971204	15.7806	4117
39.47929°N, -115.78969°W	38–104	2Ckq1	10YR 4/3	10YR 6/2	sg	95	56.1889	sopo	lo	lo	SL	11.7731	10.5159	77.711	39.47929°N, -115.78969°W	38–104	2Ckq1	nil	ND	SE	I	none	none	none	2.7814	ND	9.14667	0.986019	27.1177	4118
	104–150+	2Ckq2	10YR 3/3	10YR 5/1	sg	ND	61.4258	sopo	lo	lo	SL	11.7251	8.31274	79.9622		104–150+	2Ckq2	nil	NA	EV	I+	none	none	none	2.40473	ND	9.02333	0.991924	18.4345	4119
LMt.2	0–7	Av	2.5Y–>10YR 4/2	2.5Y 6/2	2cpl 50 %, 1msbk 50%	20	20.3814	sopo	vfr	so	SL	12.0666	22.6883	65.2451	LMt.2	0–7	Av	nil	as	EV	none	none	none	none	2.37306	1.96821	8.99667	0.989934	12.4078	4105
1819 m	7–33	Bwk1	10YR 5/3	10YR 7/2	1fgr 50%, 1sbk 50%	30	27.8901	sopo	vfr	so	ND	ND	ND	ND	1819 m	7–33	Bwk1	nil	as	EV	I+	none	none	none	1.94742	2.21256	8.65333	0.985175	14.9244	4106
Eolian/beach gravels	33–60	Bwk2	2.5Y–>10YR 5/3	2.5Y–>10YR 7/2	sg	50	39.5062	sopo	lo	lo	SL	14.9648	15.7249	69.3103	Eolian/beach gravels	33–60	Bwk2	nil	as	EV	I+	none	none	none	1.99318	1.9	8.64333	0.98773	44.7532	4107
ls, ss, dol	60–89	2Coxkm†††	10YR 6/1.5	10YR 7.5/1	massive	95	93.3131	sopo	lo	lo	SL	14.2461	12.3147	73.4392	ls, ss, dol	60–89	2Coxkm##	nil	cs	EV	none	none	none	cw	1.79864	1.91	8.79	0.993671	54.0698	4108
39.47865°N, -115.78428°W	89–146+	2Coxk	10YR 3/2	10YR 5/1	sg	>80	75.7778	sopo	lo	lo	LS	9.23298	5.45705	85.31	39.47865°N, -115.78428°W	89–146+	2Coxk	nil	NA	EV	I+	none	none	none	2.57992	1.46	9.20667	0.991425	29.0473	4109
LMt.3	0–5	Av	2.5Y 5/3	2.5Y 7/2	2cpl 75%, 1m–>csbk 25%	10	9.76645	sopo	vfr	sh	L	12.7105	35.6843	51.6051	LMt.3	0–5	Av	nil	as	EV	none	none	none	none	2.34734	1.90935	8.70333	0.988063	10.6228	4110
1819 m	5–12	Btk1	2.5Y 4/3	2.5Y 6/2	1fsbk 25%, sg 75%	10	19.171	sopo	vfr	so	SCL	23.1519	18.6526	58.1955	1819 m	5–12	Btk1	nil	aw	EV	I+	none	none	none	3.11034	1.95589	8.64	0.980928	15.8596	4111
Eolian/beach gravels	12–22	Btk2	2.5Y 3/2	2.5Y 5/2	sg	30	22.807	sopo	lo	lo	SL	19.1611	9.81989	71.019	Eolian/beach gravels	12–22	Btk2	nil	aw	EV	I	none	none	none	2.28098	1.55	8.72333	0.989374	25.3608	4112
ls, ss, dol	22–86+	2Ck	2.5Y 2/0	2.5Y 4/0	sg	<75	19.9357	sopo	lo	lo	LS	8.73197	4.69065	86.5774	ls, ss, dol	22–86+	2Ck	nil	NA	SE	I+	none	none	none	2.36031	1.4644	8.97333	0.990575	20.7688	4113
39.47828°N, -115.78447°W															39.47828°N, -115.78447°W
LMt.4	0–6	Av	2.5Y5/3	2.5Y–>10YR7/2	2fpl	10	ND	ssps	fr	sh	SL	ND	ND	ND	LMt.4	0–6	Av	nil	aw	EV	none	none	none	none	ND	ND	ND	ND	ND	NA
1849 m	6–24	Bwkq	2.5Y5/4	2.5Y7/3	2fsbk	20	ND	ssps	fr	sh	SiL	ND	ND	ND	1849 m	6–24	Bwkq	nil	cw	EV	I+	none	none	none	ND	ND	ND	ND	ND	NA
Eolian/beach gravels	24–60	2Bkm1	10YR5/3	N10/0	m	70	ND	sopo	vfi	vh	SiL	ND	ND	ND	Eolian/beach gravels	24–60	2Bkm1	nil	gs	EV	III	none	none	cs	ND	ND	ND	ND	ND	NA
ss, ls, dol	60–79	2Bkm2	10YR5/3	N10/0	m	75	ND	sopo	vfi	vh	SiL	ND	ND	ND	ss, ls, dol	60–79	2Bkm2	nil	cw	EV	II+	none	none	cw	ND	ND	ND	ND	ND	NA
39.47958°N, -115.78914°W	79–105	2Ck	2.5Y4/2	2.5Y6/2	sg	90	ND	sopo	lo	lo	SiL	ND	ND	ND	39.47958°N, -115.78914°W	79–105	2Ck	nil	cw	EV	I+	none	none	none	ND	ND	ND	ND	ND	NA
	105–122+	2Ck	5Y3/1	5Y5/1	sg	95	ND	sopo	lo	lo	SiL	ND	ND	ND		105–122+	2Ck	nil	NA	EV	I	none	none	none	ND	ND	ND	ND	ND	NA
LMt.5	0–4	Av	2.5Y4/2	2.5Y6/2	2fpl	10	ND	sopo	fr	so	SL	ND	ND	ND	LMt.5	0–4	Av	nil	cs	EV	none	none	none	none	ND	ND	ND	ND	ND	NA
1838 m	4–23	Bwk	2.5Y5/3	2.5Y6/2	1fsbk	25	ND	sopo	vfr	so	LS	ND	ND	ND	1838 m	4–23	Bwk	nil	cs	EV	1	none	none	none	ND	ND	ND	ND	ND	NA
Eolian/beach gravels	23–80+	2Ck	2.5Y2/0	2.5Y5/0	sg	95	ND	sopo	lo	lo	S	ND	ND	ND	Eolian/beach gravels	23–80+	2Ck	nil	cs	EV	1	none	none	none	ND	ND	ND	ND	ND	NA
ss, ls, dol															ss, ls, dol
39.47847°N, -115.78850°W															39.47847°N, -115.78850°W
LMt.6	0–7	Av	2.5Y 4.5/3	2.5Y 7/2	2fpl	15	ND	ssps	fr	sh	L	ND	ND	ND	LMt.6	0–7	Av	nil	cs	EV	none	none	none	none	ND	ND	ND	ND	ND	NA
1836 m	7–11	2Ck	2.5Y 4/3	2.5Y 3/3	sg	80	ND	sopo	lo	lo	SL	ND	ND	ND	1836 m	7–11	2Ck	nil	cw	EV	I	none	none	none	ND	ND	ND	ND	ND	NA
Eolian/beach gravels	11–130+	2Ckq	2.5Y 3/0	ND	sg	95	ND	sopo	lo	lo	S	ND	ND	ND	Eolian/beach gravels	11–130+	2Ckq	nil	NA	ES	I+	none	none	none	ND	ND	ND	ND	ND	NA
ss, ls, dol															ss, ls, dol
39.47780°N, -115.78877°W															39.47780°N, -115.78877°W
TABLE DR1. SOIL DESCRIPTIONS AND LABORATORY DATA IN NEWARK VALLEY															TABLE DR1. SOIL DESCRIPTIONS AND LABORATORY DATA IN NEWARK VALLEY
Profile no., elevation, parent materials, lithologies*, GPS location (WGS1984)	Depth (cm)	Horizon†	Moist color	Dry color	Structure	Gravel (visual %)	Gravel (weight %)	Wet con.	Moist con.	Dry con.	Texture	Clay (%)	Silt (%)	Sand (%)	Profile no., elevation, parent materials, lithologies*, GPS location (WGS1984)	Depth (cm)	Horizon†	Clay films	Lower boundary	Efferves-cence	CaCO3 stage§	SiO2 stage#	Gypsum stage††	Cementation	LOI††	Bd (g/cm3)§§	pH	MF††	CaCO3 (%)	HSL No.
Sill	0–6	Av	10YR 5/3	10YR 7/2	3fpl	trace	ND	svp	vfr	h	CL	27.3927	43.3004	29.307	Sill	0–6	Av	nil	aw	EV	none	none	none	none	2.50187	1.54213	8.03	0.967478	1.52925	4252
1890 m	6–17	Btkxb	10YR 3.5/4	10YR 4/4	3fsbk	trace	ND	svp	vfr	vh	SiCL	34.6636	43.5318	21.8047	1890 m	6–17	Btkxb	3ppf	cw	EV	none	none	none	none	3.25127	1.31929	8.195	0.909158	1.639	4253
Eolian/alluvial gravels	17–24	Btk1b	10YR 4/4	7.5YR–>10YR 4/4	3mpr	trace	ND	svp	vfr	sh	CL	28.9418	39.6932	31.3651	Eolian/alluvial gravels	17–24	Btk1b	3ppf	cs	EV	none	none	none	none	3.10562	1.47377	8.575	0.860086	1.29645	4254
ND	24–33	Btk2b	10YR 4/4	10YR 4.5/4	3fpr	trace	ND	sp	vfr	sh	CL	31.5832	38.3869	30.03	ND	24–33	Btk2b	3ppf	cs	EV	II	none	none	none	3.06154	1.48039	8.6	0.850733	0.534199	4255
39.91318°N, -115.66845°W	33–42	Btkx'1b	10YR 5/4	10YR 7/4	3vfpr	0	ND	svp	fr	h	SiL	21.5313	56.1527	22.316	39.91318°N, -115.66845°W	33–42	Btkx'1b	3ppf	cs	EV	I	none	none	none	3.19798	1.32851	8.63	0.836146	19.3123	4256
	42–53	Btkx'2b	10YR 5/4	10YR 5.5/4	2–>3vfpr	0	ND	ssp	fr	h	CL	34.7596	40.1956	25.0447		42–53	Btkx'2b	3ppf	as	EV	none	none	none	none	3.29415	1.35696	8.545	0.858713	40.4247	4257
	53–68	Btkx'1b'	10YR 5/4	10YR 6/6	2msbk	0	ND	ssp	fr	h	SiCL	35.3864	46.6463	17.9673		53–68	Btkx'1b'	3fpf	cs	EV	II	none	none	cw	4.1574	1.36629	8.025	0.838832	33.3037	4258
	68–85	Btkx'2b'	10YR 7/4.5	10YR 7/4	2msbk	0	ND	svp	fi	h	ND	ND	ND	ND		68–85	Btkx'2b'	1dpfpo	cs	EV	III+	none	none	cw	2.65296	1.11433	7.945	0.825186	38.8282	4259
	85–105	Btkx'3b'	10YR 7/4	10YR 8/2	3fpl/2msbk	0	ND	ssp	vfi/efi	h/vh	SiL	15.21	72.3046	12.4854		85–105	Btkx'3b'	nil	as	EV	II to II+	none	none	cw	3.34761	1.24388	8.21	0.837085	48.5077	4260
	105–150	2B	10YR 50% 7/4 & 50% 6/4	10YR 8/2	ND	ND	ND	ND	ND	ND	ND	ND	ND	ND		105–150	2B	ND	as	ND	II to II+	ND	none	cw	ND	ND	ND	ND	ND	NA
	150–173	2	10YR 5/4	10YR 6/4	ND	ND	ND	ND	ND	ND	ND	ND	ND	ND		150–173	2	ND	as	ND	none	none	none	none	ND	ND	ND	ND	ND	NA
	173+	3	10YR 5/4	10YR 7/2	ND	ND	ND	ND	ND	ND	ND	ND	ND	ND		173+	3	ND	NA	ND	none	none	none	none	ND	ND	ND	ND	ND	NA
Note: NA—Not applicable; ND—no data; NR—not recorded; HSL No.—Humboldt State University Soils Laboratory number.
*Lithologies: ch—chert; b—basalt; cgl-si—conglomerate, silica rich, primarily composed of chert pebbles; ss—sandstone; rhy—rhyolite; qtz-sis—quartz-rich siltstone; vx-qtz—volcanics, quartz-rich; vx—mixed-volcanics,
includes: pumice, quartz-rich siltstones, rhyolites; dol—dolomite; ls—limestone, includes: carbonaceous mudstone, siltstone, sandstone, fossils.
†Nomenclature as described in Soil Science Division Staff (2017) as modified by Birkeland (1999).
§CaCO3 stage nomenclature as defined by Gile et al. (1966) as modified by Machette (1985a).
#Silica stage nomenclature from Taylor (1986).
**Gypsum stage nomenclature from Reheis (1987).
††LOI—loss on ignition; MF—moisture factor. Laboratory procedures used were those defined by Singer and Janitsky (1986) with any modifications discussed in detail in Appendix III of Redwine (2003).
§§Bulk density was determined using the cold-parrafin method (Singer and Janitsky, 1986). Italic numbers used a field technique of measured volume of water needed to fill the evacuated gravel deposit and the weight of the evacuated gravel. Bold numbers are inferred from other measurements of horizons with similar characteristics.
##Cementation in this horizon (LMt.2 60-89, 2Coxkm) is from depositional carbonate, not pedogenic carbonate.
Explanation of abbreviations used in soil descriptions (from Soil Science Division Staff, 2017)
Colors: From Munsell Soil Color Chart (Munsell Color Co., Baltimore, Md.,1954 or later editions); n.d., not determined.
Structure: grade: v1—very weak, 1—weak, 2—moderate, 3—strong; size class: vf—very fine, f—fine, m—medium, c—coarse; type: gr—granular, pl—platy, abk—angular blocky, sbk—subangular blocky, cpr—columnar prismatic, pr—prismatic, sg—single grain, m—massive; –> indicates grading to
Consistence: wet: stickiness: so—nonsticky, ss—slightly sticky, s—sticky, vs—very sticky; wet: plasticity: po—nonplastic, ps—slightly plastic, p—plastic, vp—very plastic. . moist: lo—loose, vf—very friable, fr—friable, fi—firm, vfi—very firm, efi—extremely firm, — ,dry: lo—loose, so—soft, sh—slightly hard, h—hard, vh—very hard, eh—extremely hard.
Textural classes: S—sand, LS—loamy sand, SL—sandy loam, L—loam, SiL—silt loam, SiCL—silty clay loam, CL—clay loam, SCL—sandy clay loam.
Clay films: amount: 0—none, 1—few, 2—common, 3—many; distinctness: f—faint, d—distinct, 3—prominent; location: pf—on ped faces, br—bridges between grains, co—coats grains, po—pores, cobr—colloids and bridges, n.d.—not determined.
Lower boundary: distinctness: a—abrupt, d—distinct, c—clear, g—gradual; shape: smooth, w—wavy; i—irregular; n.e.—not exposed.
Effervescence: ES—effervesce slightly, EV—effervesce violently
Cementation: cw—weakly cemented, cs—strongly cemented, ci—indurated.
